# Supplementary material for: Circulating miR-200 Family and CTCs in Metastatic Breast Cancer before, during, and after a New Line of Systemic Treatment
Source: MDPI journal article supplement (doi:10.3390/ijms23179535), 2022-08-23
Supplement: s1 [file s1]

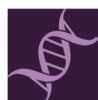

Supplementary Material

# Circulating miR-200 Family and CTCs in Metastatic Breast Cancer before, during and after a New Line of Systemic Treatment

**Table S1** Patient and tumor characteristics. Histology and receptor status refer to the primary tumor of the patient.

|                                         |          |                           |         |    | miR-200a | miR-200b | miR-200c | miR-141  | miR-429  | CTC status |
|-----------------------------------------|----------|---------------------------|---------|----|----------|----------|----------|----------|----------|------------|
| Total, N                                |          |                           |         | 47 | <i>p</i> | <i>p</i> | <i>p</i> | <i>p</i> | <i>p</i> | <i>p</i>   |
| Age at initial diagnosis (years)        | Mean     | 49.6 ( <i>median 46</i> ) |         |    | 0.846    | 0.633    | 0.7      | 0.666    | 0.325    | 0.930      |
|                                         | Range    | (33-77)                   |         |    |          |          |          |          |          |            |
| Age at BL (years)                       | Mean     | 57.3 ( <i>median 55</i> ) |         |    | 0.789    | 0.853    | 0.4      | 0.35     | 0.836    | 0.73       |
|                                         | Range    | (35-89)                   |         |    |          |          |          |          |          |            |
| IDC                                     |          | 21                        | (44.7%) |    | 0.356    | 0.46     | 0.574    | 0.413    | 0.575    | 0.351      |
| ILC                                     |          | 8                         | (17.0%) |    | 0.176    | 0.483    | 0.359    | 0.31     | 0.269    | 0.228      |
| Inflammatory                            |          | 1                         | (2.1%)  |    | 0.461    | 0.543    | 0.604    | 0.371    | 0.327    | 0.375      |
| Unknown                                 |          | 17                        | (36.2%) |    |          |          |          |          |          |            |
| ER status                               |          |                           |         |    | 0.416    | 0.731    | 0.551    | 0.819    | 0.524    | 0.438      |
|                                         | Positive | 38                        | (80.8%) |    |          |          |          |          |          |            |
|                                         | Negative | 7                         | (14.9%) |    |          |          |          |          |          |            |
|                                         | Unknown  | 2                         | (4.3%)  |    |          |          |          |          |          |            |
| PR status                               |          |                           |         |    | 0.409    | 0.708    | 0.381    | 0.895    | 0.589    | 0.199      |
|                                         | Positive | 32                        | (68.1%) |    |          |          |          |          |          |            |
|                                         | Negative | 11                        | (23.4%) |    |          |          |          |          |          |            |
|                                         | Unknown  | 4                         | (8.5%)  |    |          |          |          |          |          |            |
| HER2 status                             |          |                           |         |    | 0.397    | 0.144    | 0.276    | 0.13     | 0.241    | 0.241      |
|                                         | Positive | 5                         | (10.6%) |    |          |          |          |          |          |            |
|                                         | Negative | 33                        | (70.2%) |    |          |          |          |          |          |            |
|                                         | Unknown  | 9                         | (19.1%) |    |          |          |          |          |          |            |
| Overall survival (months)               | Median   | 21                        |         |    |          |          |          |          |          |            |
|                                         | Range    | (3-84)                    |         |    |          |          |          |          |          |            |
| Progression-free survival (months)      | Median   | 5                         |         |    |          |          |          |          |          |            |
|                                         | Range    | (1-47)                    |         |    |          |          |          |          |          |            |
| Distant metastasis at initial diagnosis |          |                           |         |    | 0.637    | 0.76     | 0.597    | 0.742    | 0.476    | 0.321      |
|                                         | M0       | 29                        | (61.7%) |    |          |          |          |          |          |            |
|                                         | M1       | 10                        | (21.3%) |    |          |          |          |          |          |            |
|                                         | Unknown  | 8                         | (17.0%) |    |          |          |          |          |          |            |

|                     |     |    |         |        |        |        |        |        |       |
|---------------------|-----|----|---------|--------|--------|--------|--------|--------|-------|
| Local metastasis    |     |    |         | 0.026* | 0.049* | 0.094  | 0.742  | 0.476  | 0.23  |
|                     | Yes | 23 | (48.9%) |        |        |        |        |        |       |
|                     | No  | 24 | (51.1%) |        |        |        |        |        |       |
| Visceral metastasis |     |    |         | 0.837  | 0.513  | 0.704  | 0.272  | 0.545  | 0.766 |
|                     | Yes | 25 | (53.2%) |        |        |        |        |        |       |
|                     | No  | 22 | (46.8%) |        |        |        |        |        |       |
| Bone metastasis     |     |    |         | 0.003* | 0.031* | 0.030* | 0.037* | 0.034* | 0.072 |
|                     | Yes | 37 | (78.7%) |        |        |        |        |        |       |
|                     | No  | 10 | (21.3%) |        |        |        |        |        |       |
| Chemotherapy        |     |    |         | 0.174  | 0.135  | 0.221  | 0.365  | 0.115  | 0.880 |
|                     | Yes | 45 | (95.7%) |        |        |        |        |        |       |
|                     | No  | 2  | (4.3%)  |        |        |        |        |        |       |
| Endocrine therapy   |     |    |         | 0.283  | 0.552  | 0.568  | 0.657  | 0.977  | 0.902 |
|                     | Yes | 35 | (74.5%) |        |        |        |        |        |       |
|                     | No  | 12 | (25.5%) |        |        |        |        |        |       |

BL – baseline, IDC – invasive ductal carcinoma, ILC – invasive lobular carcinoma, ER – estrogen receptor, PR – progesterone receptor, HER2 – human epidermal growth factor receptor 2, CTC – circulating tumor cells, *p* – statistical p-value

**Table S2** miRNA detection rates of the analyzed miRNA panel across measurements in time

| miRNA    | miRNA <sub>BL</sub> |        |      | miRNA <sub>1c</sub> |       |      | miRNA <sub>PD</sub> |       |      |
|----------|---------------------|--------|------|---------------------|-------|------|---------------------|-------|------|
|          | <i>N</i>            | mean   | SD   | <i>N</i>            | mean  | SD   | <i>N</i>            | mean  | SD   |
| miR 200a | 47                  | 32.52  | 2.09 | 47                  | 33.70 | 2.05 | 46                  | 32.06 | 2.47 |
| miR 200b | 47                  | 33.22  | 2.30 | 45                  | 34.54 | 2.23 | 46                  | 32.62 | 2.65 |
| miR 200c | 47                  | 33.72  | 2.13 | 47                  | 34.37 | 2.00 | 46                  | 32.84 | 2.42 |
| miR 141  | 47                  | 33.60  | 2.82 | 46                  | 35.57 | 2.75 | 46                  | 33.19 | 3.01 |
| miR 429  | 47                  | 36.02  | 2.58 | 43                  | 37.37 | 2.74 | 46                  | 35.39 | 3.09 |
| miR 375  | 47                  | 29.69  | 2.24 | 47                  | 30.30 | 2.31 | 46                  | 29.05 | 2.75 |
| miR 210  | 47                  | 44.651 | 1.18 | 47                  | 31.69 | 1.68 | 46                  | 30.33 | 1.58 |
| miR 365  | 47                  | 31.46  | 1.35 | 47                  | 31.92 | 1.88 | 46                  | 30.88 | 1.58 |
| miR 1260 | 47                  | 31.02  | 1.76 | 47                  | 30.97 | 1.69 | 46                  | 30.70 | 1.50 |
| miR 16   | 47                  | 23.56  | 1.26 | 47                  | 23.74 | 1.64 | 46                  | 22.89 | 1.05 |
| miR 24   | 47                  | 28.97  | 1.21 | 47                  | 28.97 | 1.21 | 46                  | 28.34 | 1.19 |
| miR 29a  | 47                  | 27.93  | 0.89 | 47                  | 28.33 | 1.07 | 46                  | 27.42 | 1.12 |
| miR 138  | 40                  | 37.98  | 1.74 | 35                  | 37.88 | 1.56 | 42                  | 37.41 | 1.38 |

*Note.* Cp – crossing point value, miRNA<sub>BL</sub> – measurement at baseline, miRNA<sub>1c</sub> – measurement after 1 completed cycle of a new line of systemic therapy, miRNA<sub>PD</sub> – measurement at progression of disease, *N* – sample size, mean – arithmetic mean, SD – standard deviation

**Table S3** Linear regression analyzing miRNA expression and CTC status in relation to relevant clinical characteristics.

|                                         | miR 200a |         | miR 200b |         | miR 200c |         | miR 141  |         | miR 429  |         | CTC status |         |
|-----------------------------------------|----------|---------|----------|---------|----------|---------|----------|---------|----------|---------|------------|---------|
|                                         | Estimate | p-value | Estimate   | p-value |
| Age at initial diagnosis                | -0.0     | 0.846   | -0.01    | 0.633   | 0.01     | 0.7     | 0.02     | 0.666   | -0.03    | 0.325   | -0.0       | 0.93    |
| Age at BL                               | 0.01     | 0.789   | -0.01    | 0.853   | 0.021    | 0.4     | 0.03     | 0.35    | 0.01     | 0.836   | -0.0       | 0.73    |
| IDC                                     | 0.57     | 0.356   | 0.51     | 0.46    | 0.36     | 0.574   | 0.68     | 0.413   | 0.43     | 0.575   | -0.14      | 0.351   |
| ILC                                     | -1.10    | 0.176   | -0.63    | 0.483   | -0.77    | 0.359   | -1.12    | 0.31    | -1.12    | 0.269   | 0.24       | 0.228   |
| Other                                   | -1.58    | 0.461   | -1.44    | 0.543   | -1.14    | 0.604   | -2.58    | 0.371   | -2.59    | 0.327   | 0.46       | 0.375   |
| ER status                               | -0.71    | 0.416   | -0.33    | 0.731   | -0.53    | 0.551   | 0.27     | 0.819   | 0.67     | 0.524   | -0.16      | 0.438   |
| PR status                               | -0.60    | 0.409   | -0.30    | 0.708   | -0.67    | 0.381   | 0.13     | 0.895   | 0.48     | 0.589   | -0.23      | 0.199   |
| HER2 status                             | -0.83    | 0.397   | -1.62    | 0.144   | -1.17    | 0.276   | -2.13    | 0.13    | -1.36    | 0.241   | -1.36      | 0.241   |
| Distant metastasis at initial diagnosis | -0.37    | 0.637   | 0.27     | 0.76    | 0.43     | 0.597   | -0.35    | 0.742   | -0.67    | 0.476   | -0.19      | 0.321   |
| Local metastasis                        | 1.36     | 0.026   | 1.33     | 0.049   | 1.06     | 0.0936  | 1.15     | 0.168   | 1.33     | 0.081   | -0.18      | 0.23    |
| Visceral metastasis                     | -0.13    | 0.837   | -0.45    | 0.513   | -0.24    | 0.704   | -0.93    | 0.272   | -0.47    | 0.545   | 0.05       | 0.766   |
| Bone metastasis                         | -2.12    | 0.003   | -1.75    | 0.031   | -1.63    | 0.030   | -2.08    | 0.037   | -1.93    | 0.0341  | 0.32       | 0.072   |
| Chemotherapy                            | 2.06     | 0.174   | 2.49     | 0.135   | 1.90     | 0.221   | 1.87     | 0.365   | 2.95     | 0.115   | 0.06       | 0.880   |
| Endocrine therapy                       | -0.74    | 0.283   | -0.45    | 0.552   | -0.40    | 0.568   | -0.41    | 0.657   | -0.02    | 0.977   | 0.02       | 0.902   |
| Bevacizumab                             | 1.74     | 0.078   | 1.41     | 0.199   | 1.29     | 0.204   | 1.02     | 0.453   | 1.14     | 0.357   | -0.17      | 0.477   |
| CTC status                              | -2.03    | <0.001  | -2.23    | <0.001  | -2.02    | <0.001  | -3.10    | <0.001  | -2.80    | <0.001  |            |         |

CTC – circulating tumor cells, CTC<sub>BL</sub>- measurement at baseline, IDC – invasive ductal carcinoma, ILC – invasive lobular carcinoma, ER – estrogen receptor, PR – progesterone receptor, HER2 – human epidermal growth factor receptor 2, Estimate - logistic regression coefficient, p - statistical p-value

**Table S4** Results of univariable logistic regression analysis of miRNA expression as a predictor for CTC status

| miRNA    | CTCBL    |       | CTC1C    |       | CTCPD    |       |
|----------|----------|-------|----------|-------|----------|-------|
|          | Estimate | p     | Estimate | p     | Estimate | p     |
| miR-200a | -0.60    | 0.003 | -0.88    | 0.001 | -0.43    | 0.008 |
| miR-200b | -0.55    | 0.003 | -0.60    | 0.004 | -0.33    | 0.016 |
| miR-200c | -0.55    | 0.003 | -0.64    | 0.004 | -0.34    | 0.021 |
| miR-141  | -0.54    | 0.001 | -0.52    | 0.003 | -0.28    | 0.016 |
| miR-429  | -0.58    | 0.001 | -0.51    | 0.004 | -0.29    | 0.012 |

CTC – circulating tumor cells, CTCBL – CTC status at baseline, CTC1C – CTC status after 1 completed cycle of a new line of systemic therapy, CTCPD – CTC status at disease progression, p – statistical p-value

**Table S5** Results of cox proportional hazard model between OS and miRNA expression. HR calculated as the ratio of the probability of progression of the disease of miRNA high-level group to that of miRNA low-level group.

| miRNAs     | CTC <sub>BL</sub>  |          | CTC <sub>1C</sub>  |          | CTC <sub>PD</sub>  |          |
|------------|--------------------|----------|--------------------|----------|--------------------|----------|
|            | HR (95% CI for HR) | <i>p</i> | HR (95% CI for HR) | <i>p</i> | HR (95% CI for HR) | <i>p</i> |
| miR 200a   | 2.59 (1.28-5.21)   | 0.008    | 3.12 (1.54-6.31)   | 0.002    | 1.91 (0.95-3.85)   | 0.072    |
| miR 200b   | 2.59 (1.28-5.21)   | 0.008    | 3.05 (1.50-6.22)   | 0.002    | 1.62 (0.81-3.24)   | 0.176    |
| miR 200c   | 2.54 (1.26-5.12)   | 0.009    | 3.69 (1.79-7.61)   | <0.001   | 1.78 (0.89-3.59)   | 0.106    |
| miR 141    | 2.50 (1.24-5.04)   | 0.011    | 4.27 (2.04-8.91)   | 0.000    | 1.70 (0.84-3.44)   | 0.137    |
| miR 429    | 2.73 (1.35-5.51)   | 0.005    | 3.09 (1.47-6.47)   | 0.003    | 2.12 (1.05-4.30)   | 0.036    |
| CTC status | 2.07 (1.12-3.85)   | 0.021    | 2.14 (1.16-3.97)   | 0.015    | 2.58 (1.38-4.84)   | 0.003    |
| Age        | 0.99 (0.97-1.02)   | 0.544    | 0.99 (0.97-1.02)   | 0.552    | 0.98 (0.96-1.01)   | 0.120    |
| M          | 1.05 (0.37-2.96)   | 0.930    | 1.04 (0.37-2.95)   | 0.937    | 0.96 (0.36-2.58)   | 0.936    |
| Local      | 0.56 (0.30-1.05)   | 0.071    | 0.58 (0.31-1.07)   | 0.080    | 0.72 (0.39-1.35)   | 0.309    |
| Visceral   | 1.49 (0.80-2.76)   | 0.206    | 1.53 (0.83-2.84)   | 0.176    | 1.10 (0.59-2.06)   | 0.764    |
| Bone       | 2.53 (1.14-5.62)   | 0.023    | 2.54 (1.14-5.64)   | 0.022    | 2.11 (0.93-4.79)   | 0.074    |

OS – overall survival, CTC – circulating tumor cells, CTC<sub>BL</sub> – measurement at baseline, CTC<sub>1C</sub> – measurement after 1 completed cycle of a new line of systemic therapy, CTC<sub>PD</sub> – measurement at progression of disease, Age – age at study entry, M – metastatic status at initial diagnosis, Local/Visceral/Bone – location of metastasis, HR – hazard ratio, CI – confidence interval, *p* – statistical *p*-value

**Table S6** Results of cox proportional hazard model between PFS and miRNA expression. HR calculated as the ratio of the probability of progression of the disease of miRNA high-level group to that of miRNA low-level group.

| miRNAs     | CTC <sub>BL</sub>  |          | CTC <sub>1C</sub>  |          |
|------------|--------------------|----------|--------------------|----------|
|            | HR (95% CI for HR) | <i>p</i> | HR (95% CI for HR) | <i>p</i> |
| miR 200a   | 1.49 (0.66-3.39)   | 0.340    | 2.25 (1.05-4.82)   | 0.037    |
| miR 200b   | 1.49 (0.66-3.39)   | 0.340    | 2.16 (1.00-4.66)   | 0.049    |
| miR 200c   | 1.84 (0.84-4.07)   | 0.129    | 2.81 (1.33-5.93)   | 0.007    |
| miR 141    | 1.62 (0.74-3.55)   | 0.233    | 2.74 (1.25-6.01)   | 0.012    |
| miR 429    | 1.43 (0.63-3.26)   | 0.390    | 2.50 (1.11-5.65)   | 0.028    |
| CTC status | 0.80 (0.40-1.57)   | 0.514    | 1.63 (0.82-3.25)   | 0.165    |
| Age        | 1.00 (0.97-1.03)   | 0.864    | 1.01 (0.98-1.05)   | 0.367    |
| M          | 1.30 (0.57-2.98)   | 0.535    | 1.10 (0.48-2.51)   | 0.819    |
| Local      | 0.74 (0.37-1.46)   | 0.382    | 0.43 (0.21-0.89)   | 0.023    |
| Visceral   | 1.00 (0.51-1.95)   | 0.99     | 1.31 (0.66-2.58)   | 0.440    |
| Bone       | 0.90 (1.08-7.80)   | 0.035    | 2.72 (1.08-6.85)   | 0.033    |

PFS – progression-free survival, CTC – circulating tumor cells, CTC<sub>BL</sub> – measurement at baseline, CTC<sub>1C</sub> – measurement after 1 completed cycle of a new line of systemic therapy, Age – age at study entry, M – metastatic status at initial diagnosis, Local/Visceral/Bone – location of metastasis, HR – hazard ratio, CI – confidence interval, *p* – statistical *p*-value
